# Supplementary material for: Aquatic ecotoxicity of personal care products: QSAR models and ranking for prioritization and safer alternatives’ design
Source: Royal Society of Chemistry journal article supplement (doi:10.1039/c5gc02818c), 2016-01-01
Supplement: c5gc02818c2.xlsx [file c5gc02818c2.xlsx]

## Sheet: Table of Contents
Supporting information of
Aquatic ecotoxicity of personal care products: QSAR models and ranking for prioritization and safer alternatives’ design
Paola Gramatica*, Cassani Stefano and Alessandro Sangion
QSAR Research Unit in Environmental Chemistry and Ecotoxicology, Department of Theoretical and Applied Sciences, University of Insubria, Varese, Italy
E-mail: paola.gramatica@uninsubria.it; http://www.qsar.it; Tel: +39-0332-421573
SI
Content of Sheets:
P.subcapitata: CAS, SMILES, Experimental response, Predicted response, Hat, Molecular descriptors and Splitting schemes for the P.subcapitata models
D.manga: CAS, SMILES, Experimental response, Predicted response, Hat, Molecular descriptors and Splitting schemes for the D.magna models
P.promelas logP: CAS, SMILES, Experimental response, Predicted response, Hat, Molecular descriptors and Splitting schemes for the P.promelas logP models
P.promelas logP free: CAS, SMILES, Experimental response, Predicted response, Hat, Molecular descriptors and Splitting schemes for the P.promelas logP free models

## Sheet: P.subcapitata
CAS	SMILES	EC50 g/L	pEC50 mol/L	Pred. by model eq.	HAT i/i (h*=0.4500)	GGI8	Mp	Random	by Resp	by Strut
000078-59-1	O=C1C=C(C)CC(C)(C)C1	0.132	3.0196	3.1596	0.1205	0	0.627922	Prediction	Prediction	Training
000078-93-3	CCC(=O)C	0.5	2.1587	2.3373	0.2075	0	0.590343	Training	Training	Training
000079-92-5	C=C1[C@H]2CC[C@H](C2)C1(C)C	0.458	2.4731	3.2121	0.1171	0	0.630324	Prediction	Prediction	Training
000084-66-2	c1(ccccc1C(=O)OCC)C(=O)OCC	0.0841	3.5045	3.9727	0.0768	0.0246914	0.650361	Prediction	Training	Prediction
000084-74-2	CCCCOC(=O)c1ccccc1C(=O)OCCCC	0.0004	5.8422	5.1536	0.058	0.139582	0.635835	Training	Training	Training
000085-68-7	CCCCOC(=O)c1ccccc1C(=O)OCc1ccccc1	0.00239	6.4152	6.2165	0.0906	0.15999	0.672244	Prediction	Training	Training
000085-69-8	CCCCOC(=O)c1cccc(c1)C(=O)OC[C@@H](CC)CCCC	0.00032	6.0189	6.0485	0.1171	0.221718	0.627764	Prediction	Training	Training
000099-87-6	c1cc(ccc1C)C(C)C	0.049	3.4373	3.6334	0.0982	0	0.649578	Prediction	Training	Training
000100-41-4	c1ccc(cc1)CC	0.0046	4.4693	3.9986	0.0949	0	0.666265	Training	Training	Prediction
000100-42-5	c1cc(ccc1)C=C	0.0014	5.16	4.7288	0.1244	0	0.699639	Training	Prediction	Prediction
000101-84-8	O(c1ccccc1)c1ccccc1	0.0017	5.0002	5.0916	0.157	0	0.716218	Training	Training	Training
000117-81-7	CCCC[C@H](CC)COC(=O)c1ccccc1C(=O)OC[C@@H](CC)CCCC	0.0001	6.5914	7.0076	0.2381	0.303855	0.622629	Prediction	Prediction	Prediction
000119-06-2	CCCCCCCCCCCCCOC(=O)c1ccccc1C(=O)OCCCCCCCCCCCCC	0.0006	5.9465	5.3508	0.0938	0.188964	0.615407	Training	Training	Training
000124-18-5	CCCCCCCCCC	0.089	3.2034	2.5863	0.1871	0.0246914	0.587003	Training	Prediction	Training
000131-11-3	COC(=O)c1ccccc1C(=O)OC	0.044	3.7655	3.9287	0.0946	0	0.663072	Training	Training	Prediction
003380-34-5	c1(cc(ccc1Oc1ccc(cc1Cl)Cl)Cl)O	5.3e-07	7.9278	7.999	0.647	0.0493827	0.819649	Training	Training	Prediction
003648-20-2	c1(ccccc1C(=O)OCCCCCCCCCCC)C(=O)OCCCCCCCCCCC	0.0021	5.3539	5.4005	0.092	0.188964	0.617676	Prediction	Prediction	Prediction
026761-40-0	CC(C)CCCCCCCOC(=O)c1ccccc1C(=O)OCCCCCCCC(C)C	0.0008	5.7466	6.0753	0.138	0.238347	0.619073	Training	Training	Prediction
027554-26-3	CC(C)CCCCCOC(=O)c1ccccc1C(=O)OCCCCCC(C)C	0.00013	6.4774	6.153	0.137	0.238347	0.622629	Training	Prediction	Training
028553-12-0	CC(C)CCCCCCOC(=O)c1ccccc1C(=O)OCCCCCC(C)C	0.0018	5.3514	5.809	0.1103	0.213656	0.621624	Training	Prediction	Training

## Sheet: D.magna
CAS	SMILES	EC50 g/L	pEC50 mol/l	Pred. by model eq.	HAT i/i (h*=0.1667)	MW	ATSC0c	GATS1p	Random	by Resp	by Strut
000057-55-6	C([C@H](C)O)O	0.11	2.8397	1.7204	0.0647	76.0524	0.419616	1.70133	Training	Training	Training
000064-17-5	OCC	0.1	2.6632	1.6129	0.0897	46.0419	0.212329	1.90725	Prediction	Training	Training
000066-25-1	O=CCCCCC	0.0056	4.2522	3.1785	0.0471	100.089	0.137451	1.57883	Prediction	Training	Prediction
000078-59-1	O=C1C=C(C)CC(C)(C)C1	0.12	3.061	4.2096	0.0273	138.104	0.141006	1.27533	Training	Training	Training
000078-70-6	O[C@@](C=C)(C)CCC=C(C)C	0.0367	3.6232	3.9397	0.0182	154.136	0.256112	1.37167	Training	Training	Training
000078-83-1	CC(C)CO	1.03	1.8568	2.3339	0.0535	74.0732	0.221004	1.69656	Prediction	Training	Prediction
000078-93-3	CCC(=O)C	0.52	2.1417	2.7561	0.0566	72.0575	0.116735	1.61828	Training	Training	Training
000079-06-1	C=CC(=O)N	0.16	2.6474	3.0297	0.0419	71.0371	0.248371	1.14986	Training	Prediction	Training
000079-92-5	C=C1[C@H]2CC[C@H](C2)C1(C)C	0.022	3.7915	4.5987	0.0446	136.125	0.0440848	1.2037	Training	Prediction	Prediction
000081-14-1	c1(c(c(c(c(c1C)C(=O)C)C)N(=O)=O)C(C)(C)C)N(=O)=O	0.00046	5.8058	6.3449	0.046	294.122	0.272955	1.16278	Prediction	Training	Prediction
000081-15-2	c1(c(c(c(c(c1C)N(=O)=O)C)N(=O)=O)C(C)(C)C)N(=O)=O	0.00015	6.2968	6.6031	0.0571	297.096	0.225559	1.1228	Prediction	Prediction	Training
000083-66-9	c1(c(c(c(cc1C(C)(C)C)N(=O)=O)C)N(=O)=O)OC		5.636	5.6474	0.028	268.106	0.328404	1.24296	Training	Training	Training
000084-66-2	c1(ccccc1C(=O)OCC)C(=O)OCC	0.052	3.6305	4.1832	0.0309	222.089	0.534604	1.30826	Training	Training	Training
000084-74-2	CCCCOC(=O)c1ccccc1C(=O)OCCCC	0.00299	4.9686	4.9143	0.0342	278.152	0.553141	1.35259	Training	Training	Prediction
000084-75-3	CCCCCCOC(=O)c1ccccc1C(=O)OCCCCCC	0.00018	6.2688	5.6752	0.051	334.214	0.57017	1.38057	Training	Training	Training
000085-68-7	CCCCOC(=O)c1ccccc1C(=O)OCc1ccccc1	0.00076	5.6135	5.7565	0.0424	312.136	0.550162	1.14666	Training	Prediction	Training
000085-69-8	CCCCOC(=O)c1cccc(c1)C(=O)OC[C@@H](CC)CCCC	7e-05	6.6789	5.6939	0.0507	334.214	0.564311	1.38057	Training	Prediction	Prediction
000090-02-8	O=Cc1ccccc1O	0.0032	4.5813	3.9595	0.0594	122.037	0.336469	0.865446	Training	Training	Training
000090-05-1	Oc1ccccc1OC	0.02595	3.6795	3.4795	0.039	124.052	0.380034	1.10994	Training	Prediction	Prediction
000094-13-3	C(=O)(c1ccc(cc1)O)OCCC	0.0123	4.1656	3.9355	0.0327	180.079	0.474445	1.17496	Training	Prediction	Training
000094-18-8	C(=O)(c1ccc(cc1)O)OCc1ccccc1	0.004	4.756	5.0103	0.0424	228.079	0.475916	0.947734	Training	Training	Training
000094-26-8	C(=O)(c1ccc(cc1)O)OCCCC	0.0053	4.5637	4.0909	0.0286	194.094	0.478895	1.20451	Training	Prediction	Training
000099-76-3	C(=O)(c1ccc(cc1)O)OC	0.0246	3.791	3.6472	0.0478	152.047	0.469113	1.09358	Prediction	Training	Training
000099-85-4	C1=C(C)CC=C(C1)C(C)C	0.00345	4.5961	4.5068	0.0443	136.125	0.0508316	1.25	Training	Prediction	Training
000099-87-6	c1cc(ccc1C)C(C)C	0.00354	4.5785	4.7082	0.048	134.11	0.0257623	1.15	Prediction	Training	Training
000099-96-7	c1(ccc(cc1)C(=O)O)O	0.173	2.9019	3.716	0.1106	138.032	0.514263	0.81168	Training	Prediction	Prediction
000100-41-4	c1ccc(cc1)CC	0.00293	4.5588	4.4342	0.0488	106.078	0.0188639	1.0625	Prediction	Training	Prediction
000100-42-5	c1cc(ccc1)C=C	0.0047	4.3452	4.541	0.0518	104.063	0.035118	0.9375	Training	Training	Training
000100-52-7	O=Cc1ccccc1	0.009	4.0712	4.2868	0.043	106.042	0.129112	0.926434	Prediction	Training	Training
000101-20-2	c1(c(ccc(c1)NC(=O)Nc1ccc(cc1)Cl)Cl)Cl	7.7e-06	7.6104	7.0184	0.0882	313.978	0.42624	0.595652	Training	Training	Prediction
000101-84-8	O(c1ccccc1)c1ccccc1	0.00067	5.4046	5.1237	0.0323	170.073	0.16805	0.938334	Training	Prediction	Prediction
000104-55-2	c1ccccc1/C=C/C=O	0.00705	4.2726	4.614	0.0361	132.058	0.143523	0.942705	Prediction	Prediction	Training
000105-67-9	c1(cc(ccc1O)C)C	0.0021	4.7644	4.1035	0.0302	122.073	0.218495	1.02008	Training	Training	Prediction
000106-24-1	CC(=CCC/C(=C/CO)/C)C	0.015	4.0118	3.9377	0.0182	154.136	0.256752	1.37167	Training	Prediction	Prediction
000107-21-1	C(CO)O	10	0.7926	1.326	0.0817	62.0368	0.420116	1.81876	Training	Training	Training
000107-41-5	CC(C)(C[C@@H](C)O)O	3.2	1.5671	2.5376	0.0404	118.099	0.417027	1.59232	Prediction	Training	Training
000108-39-4	c1ccc(cc1O)C	0.0188	3.7595	4.0093	0.0404	108.058	0.214667	0.948933	Training	Training	Training
000108-45-2	c1c(cc(cc1)N)N		4.263	4.1413	0.0758	108.069	0.273864	0.73712	Training	Training	Prediction
000111-70-6	CCCCCCCO	0.063	3.2656	3.0667	0.0373	116.12	0.23422	1.6098	Training	Prediction	Training
000111-76-2	C(COCCCC)O	1	2.0722	2.327	0.0551	118.099	0.38629	1.79592	Prediction	Training	Training
000111-77-3	COCCOCCO	0.93	2.111	1.4667	0.1094	120.079	0.542136	2.05351	Training	Prediction	Training
000111-90-0	CCOCCOCCO	3.34	1.6037	1.8196	0.091	134.094	0.542222	1.96212	Prediction	Prediction	Training
000112-05-0	O=C(O)CCCCCCCC	0.096	3.2167	3.5291	0.0233	158.131	0.331007	1.5243	Training	Training	Prediction
000112-27-6	OCCOCCOCCO	35	0.6323	1.4524	0.1413	150.089	0.750311	1.92589	Prediction	Training	Training
000112-30-1	C(CCCCCCC)CCO	0.00651	4.3855	3.7206	0.0329	158.167	0.246949	1.57602	Training	Prediction	Training
000117-81-7	CCCC[C@H](CC)COC(=O)c1ccccc1C(=O)OC[C@@H](CC)CCCC	0.00016	6.3873	6.4487	0.0809	390.277	0.587422	1.3997	Training	Training	Training
000120-47-8	C(=O)(c1ccc(cc1)O)OCC	0.0187	3.9484	3.7914	0.0386	166.063	0.469627	1.13882	Training	Training	Training
000120-72-9	c1ccc2c(c1)NCC2	0.001	5.0758	4.4896	0.04	119.073	0.125137	0.932613	Training	Training	Prediction
000124-18-5	CCCCCCCCCC	0.018	3.8975	4.0844	0.0784	142.172	0.0457095	1.6	Training	Training	Training
000131-11-3	COC(=O)c1ccccc1C(=O)OC	0.033	3.7694	3.8075	0.0369	194.058	0.533575	1.27537	Training	Prediction	Training
000131-57-7	c1(cc(ccc1C(=O)c1ccccc1)OC)O	0.0019	5.0793	4.9305	0.0474	228.079	0.500816	0.947734	Prediction	Training	Prediction
000137-26-8	N(C)(C)C(=S)SSC(=S)N(C)C	1e-05	7.3802	6.5924	0.0699	239.988	0.189704	0.629932	Prediction	Training	Training
000138-86-3	C1CC(=CC[C@H]1C(=C)C)C	0.0282	3.6837	4.4887	0.0429	136.125	0.0564909	1.25	Training	Training	Training
000141-78-6	O=C(OCC)C	0.56	2.1966	2.1726	0.0726	88.0524	0.254204	1.87361	Training	Training	Training
000576-26-1	Cc1cccc(C)c1O	0.01124	4.0359	4.101	0.0303	122.073	0.21926	1.02008	Prediction	Training	Training
000586-62-9	C1=C(C)CCC(=C(C)C)C1	0.00138	4.9941	4.5206	0.0453	136.125	0.0465512	1.25	Training	Training	Training
000624-92-0	CSSC	0.00161	4.7663	4.9555	0.0976	93.9911	0.026456	0.581232	Training	Prediction	Prediction
001222-05-5	O1C[C@H](c2c(C1)cc1c(c2)C([C@H](C1(C)C)C)(C)C)C	0.000282	5.4577	5.9649	0.044	258.198	0.201542	1.20178	Training	Training	Training
003380-34-5	c1(cc(ccc1Oc1ccc(cc1Cl)Cl)Cl)O	0.00018	6.204	6.4017	0.0987	287.951	0.499495	0.584877	Prediction	Training	Training
003648-20-2	c1(ccccc1C(=O)OCCCCCCCCCCC)C(=O)OCCCCCCCCCCC	2e-05	7.3751	7.6252	0.1495	474.371	0.612598	1.41917	Prediction	Prediction	Training
004065-45-6	c1(cc(c(cc1S(=O)(=O)O)C(=O)c1ccccc1)O)OC	0.05	3.7896	4.6478	0.1068	308.035	0.819459	1.26706	Training	Training	Training
004191-73-5	c1cc(ccc1C(=O)OC(C)C)O	0.0085	4.326	3.9522	0.0317	180.079	0.469237	1.17496	Prediction	Training	Training
004247-02-3	c1cc(ccc1O)C(=O)OCC(C)C	0.0076	4.4072	4.092	0.0285	194.094	0.478542	1.20451	Prediction	Training	Prediction
004602-84-0	OC/C=C(/CC/C=C(/CCC=C(C)C)\C)\C	0.0022	5.0043	4.9323	0.0227	222.198	0.283036	1.34703	Training	Prediction	Prediction
005466-77-3	COc1ccc(cc1)/C=C/C(=O)OC[C@@H](CC)CCCC	0.00029	6.0003	5.3966	0.0312	290.188	0.465281	1.34177	Training	Prediction	Training
005989-27-5	C1(=CC[C@@H](CC1)C(=C)C)C	0.000421	5.5097	4.4887	0.0429	136.125	0.0564909	1.25	Training	Training	Prediction
015323-35-0	c1(c(cc2c(c1)C([C@H](C2(C)C)C)(C)C)C)C(=O)C	0.00033	5.8692	5.9503	0.049	244.183	0.1511	1.17662	Training	Training	Training
026761-40-0	CC(C)CCCCCCCOC(=O)c1ccccc1C(=O)OCCCCCCCC(C)C	2e-05	7.3486	7.2364	0.1236	446.34	0.60272	1.41357	Training	Training	Training
027554-26-3	CC(C)CCCCCOC(=O)c1ccccc1C(=O)OCCCCCC(C)C	0.00016	6.3873	6.454	0.0809	390.277	0.585748	1.3997	Training	Training	Training
028553-12-0	CC(C)CCCCCCOC(=O)c1ccccc1C(=O)OCCCCCC(C)C	6e-05	6.8285	6.649	0.0904	404.293	0.589991	1.40357	Training	Training	Prediction
036861-47-9	C1([C@@]2(C(=O)/C(=C\c3ccc(C)cc3)/[C@H]1CC2)C)(C)C	0.00056	5.6569	6.2613	0.0501	254.167	0.157756	1.0584	Training	Training	Prediction
068140-48-7	c1(cc2c(cc1C(=O)C)[C@H]([C@@H](C2(C)C)C)C(C)C)C	0.00042	5.7887	6.1219	0.0554	258.198	0.156018	1.19448	Prediction	Prediction	Training

## Sheet: P.promelas logP
CAS	SMILES	EC 50 g/L	pEC50 mol/l	Pred. by model eq.	HAT i/i (h*=0.1791)	AVP-7	minHother	XLogP	Random	by Resp	by Strut
000057-55-6	C([C@H](C)O)O	0.71	2.0299	1.3806	0.0661	0	0	-0.748	Training	Training	Training
000064-17-5	OCC	0.1	2.6632	1.6687	0.0598	0	0	-0.076	Prediction	Training	Prediction
000066-25-1	O=CCCCCC	0.014	3.8543	4.0442	0.039	0	0.577153	2.294	Prediction	Training	Training
000071-41-0	CCCCCO	0.472	2.271	2.31	0.0642	0	0	1.42	Training	Training	Training
000078-59-1	O=C1C=C(C)CC(C)(C)C1	0.145	2.9788	3.5924	0.0251	0	0.442153	1.982	Prediction	Training	Training
000078-83-1	CC(C)CO	1.43	1.7143	1.9495	0.0586	0	0	0.579	Training	Training	Training
000078-93-3	CCC(=O)C	3.22	1.3498	1.889	0.0585	0	0	0.438	Training	Training	Training
000079-06-1	C=CC(=O)N	0.109	2.8141	2.7241	0.0889	0	0.528125	-0.516	Prediction	Prediction	Training
000079-20-9	COC(=O)C	0.32	2.3643	1.8046	0.0587	0	0	0.241	Prediction	Prediction	Prediction
000079-46-9	CC(C)N(O)O	0.21	2.6274	2.1861	0.0614	0	0	1.131	Training	Prediction	Training
000079-77-6	CC1(C)CCCC(=C1/C=C/C(=O)C)C	0.00509	4.5769	4.4348	0.0209	0.0176499	0.380972	3.65	Training	Training	Prediction
000084-62-8	c1ccc(cc1)OC(=O)c1ccccc1C(=O)Oc1ccccc1	8e-05	6.5995	6.1794	0.1392	0.00502407	0.517908	7.42	Training	Training	Training
000084-66-2	c1(ccccc1C(=O)OCC)C(=O)OCC	0.0168	4.1212	4.4722	0.0319	0.00766986	0.547556	3.18	Training	Prediction	Training
000084-69-5	CC(C)COC(=O)c1ccccc1C(=O)OCC(C)C	0.0009	5.49	5.0094	0.0387	0.00822681	0.533571	4.49	Training	Prediction	Prediction
000084-74-2	CCCCOC(=O)c1ccccc1C(=O)OCCCC	0.00085	5.5149	5.2567	0.0473	0.00892526	0.534977	5.034	Training	Training	Prediction
000085-68-7	CCCCOC(=O)c1ccccc1C(=O)OCc1ccccc1	0.00078	5.6022	5.7828	0.0977	0.00730854	0.485319	6.592	Prediction	Training	Prediction
000090-02-8	O=Cc1ccccc1O	0.0023	4.7248	3.9406	0.0336	0.00675559	0.52	2.124	Prediction	Prediction	Prediction
000094-09-7	c1cc(ccc1C(=O)OCC)N	0.0259	3.8044	3.8267	0.0423	0.00745145	0.535731	1.747	Training	Prediction	Training
000096-17-3	CC[C@@H](C)C=O	0.00997	3.9362	3.6564	0.0466	0	0.566319	1.449	Training	Prediction	Training
000100-41-4	c1ccc(cc1)CC	0.00909	4.0671	5.1315	0.0368	0.0226805	0.406597	4.954	Training	Training	Prediction
000100-42-5	c1cc(ccc1)C=C	0.00402	4.4131	5.0864	0.0395	0.0130946	0.45	4.954	Training	Training	Training
000100-52-7	O=Cc1ccccc1	0.00761	4.1441	4.2633	0.0238	0.00756015	0.477778	3.08	Prediction	Training	Prediction
000101-20-2	c1(c(ccc(c1)NC(=O)Nc1ccc(cc1)Cl)Cl)Cl	9.2e-05	6.5331	4.7247	0.0331	0.00769261	0.450388	4.302	Training	Training	Training
000101-84-8	O(c1ccccc1)c1ccccc1	0.004	4.6286	5.1215	0.0511	0.00654728	0.48	5.106	Prediction	Training	Training
000105-67-9	c1(cc(ccc1O)C)C	0.0154	3.8991	3.969	0.0226	0.0107583	0.441319	2.479	Training	Prediction	Training
000106-24-1	CC(=CCC/C(=C/CO)/C)C	0.0032	4.6828	3.8655	0.0255	0.0240339	0.302528	2.524	Training	Training	Training
000107-41-5	CC(C)(C[C@@H](C)O)O	10.7	1.0429	1.91	0.0585	0	0	0.487	Prediction	Training	Prediction
000108-10-1	O=C(C)CC(C)C	0.505	2.2971	2.3507	0.0653	0	0	1.515	Training	Training	Training
000108-39-4	c1ccc(cc1O)C	0.0559	3.2862	3.7812	0.025	0	0.452222	2.367	Prediction	Training	Training
000108-46-3	c1(cc(ccc1)O)O	0.04	3.4395	3.355	0.0528	0	0.54375	0.87	Training	Prediction	Training
000108-93-0	OC1CCCCC1	0.704	2.1528	2.271	0.0632	0	0	1.329	Training	Training	Prediction
000108-94-1	O=C1CCCCC1	0.527	2.2697	2.0957	0.0599	0	0	0.92	Training	Prediction	Prediction
000110-62-3	C(CCC=O)C	0.0124	3.8414	3.8166	0.046	0	0.584097	1.725	Prediction	Training	Training
000110-93-0	O=C(C)CCC=C(C)C	0.0857	3.1677	3.2583	0.0222	0	0.334167	1.796	Training	Prediction	Training
000111-27-3	CCCCCCO	0.0977	3.0192	2.5539	0.0725	0	0	1.989	Training	Training	Training
000111-46-6	C(COCCO)O	75.2	0.1493	1.102	0.077	0	0	-1.398	Training	Training	Training
000111-70-6	CCCCCCCO	0.0345	3.5271	3.6576	0.1149	0.0559017	0	2.558	Training	Training	Training
000111-87-5	CCCCCCCCO	0.0122	4.028	4.0254	0.1473	0.0639584	0	3.127	Prediction	Training	Training
000111-90-0	CCOCCOCCO	9.65	1.1429	1.8337	0.0657	0.0213195	0	-0.456	Training	Prediction	Training
000112-05-0	O=C(O)CCCCCCCC	0.104	3.182	3.9543	0.0717	0.0465122	0	3.587	Training	Training	Prediction
000112-27-6	OCCOCCOCCO	59.9	0.3989	1.2624	0.0897	0.0157285	0	-1.588	Prediction	Training	Training
000112-30-1	C(CCCCCCC)CCO	0.0024	4.8189	4.502	0.1319	0.0632292	0	4.265	Prediction	Training	Training
000112-42-5	CCCCCCCCCCCO	0.00104	5.219	4.7437	0.131	0.0630834	0	4.834	Training	Prediction	Training
000112-53-8	CCCCCCCCCCCCCCO	0.00101	5.3266	5.4721	0.1517	0.0628646	0	6.541	Training	Training	Training
000117-81-7	CCCC[C@H](CC)COC(=O)c1ccccc1C(=O)OC[C@@H](CC)CCCC	0.00016	6.3873	6.935	0.2163	0.00954087	0.51403	9.042	Training	Training	Training
000118-61-6	c1(c(cccc1)O)C(=O)OCC	0.0196	3.928	4.3737	0.0307	0.00775244	0.536478	3.008	Training	Training	Prediction
000119-34-6	c1c(cc(c(c1)O)N(O)O)N	0.0332	3.6665	3.8176	0.0534	0.00406294	0.590208	1.548	Prediction	Training	Prediction
000119-61-9	c1ccccc1C(=O)c1ccccc1	0.01089	4.2232	5.3799	0.0646	0.00777351	0.477778	5.677	Training	Prediction	Training
000121-32-4	c1(ccc(cc1OCC)C=O)O	0.0876	3.2778	3.8057	0.0573	0.00763129	0.577329	1.463	Training	Prediction	Training
000121-33-5	c1(ccc(cc1OC)C=O)O	0.057	3.4261	3.6271	0.0677	0.00702921	0.582431	1.04	Training	Training	Training
000122-03-2	O=Cc1ccc(cc1)C(C)C	0.00662	4.3497	4.8255	0.0315	0.0122606	0.430972	4.48	Training	Training	Training
000131-11-3	COC(=O)c1ccccc1C(=O)OC	0.039	3.6969	4.1282	0.0384	0.00750317	0.556565	2.334	Prediction	Training	Training
000138-86-3	C1CC(=CC[C@H]1C(=C)C)C	0.0385	3.5485	4.3427	0.0239	0.0251481	0.278542	3.729	Training	Training	Training
000140-88-5	C(=C)C(=O)OCC	0.0025	4.6023	3.3888	0.0508	0	0.542431	0.956	Training	Prediction	Prediction
000141-78-6	O=C(OCC)C	0.23	2.583	1.9859	0.0588	0	0	0.664	Prediction	Training	Training
000143-08-8	CCCCCCCCCO	0.00552	4.4169	4.2619	0.137	0.0634723	0	3.696	Training	Prediction	Prediction
000470-82-6	[C@]12(OC([C@@H](CC1)CC2)(C)C)C	0.102	3.1793	3.1609	0.0394	0.0225757	0	2.595	Training	Training	Prediction
000563-80-4	C(C)(C(=O)C)C	0.864	1.9984	2.0146	0.0591	0	0	0.731	Training	Prediction	Training
000576-26-1	Cc1cccc(C)c1O	0.027	3.6553	3.896	0.025	0.0107583	0.44875	2.268	Training	Prediction	Training
000586-62-9	C1=C(C)CCC(=C(C)C)C1	0.00121	5.0512	4.2175	0.0238	0.0255155	0.296319	3.326	Prediction	Training	Training
000590-86-3	CC(CC=O)C	0.00325	4.423	3.7772	0.0457	0	0.578472	1.664	Training	Training	Prediction
000868-77-9	CC(=C)C(=O)OCCO	0.227	2.7581	2.9517	0.0721	0	0.529959	0.005	Training	Training	Training
000928-96-1	OCC/C=C/CC	0.381	2.4195	3.1485	0.0232	0	0.346319	1.473	Training	Training	Prediction
002216-51-5	CC(C)[C@H]1CC[C@H](C)C[C@@H]1O	0.0189	3.9171	3.6151	0.0487	0.0349406	0	3.211	Prediction	Training	Training
002416-94-6	Oc1c(ccc(c1C)C)C	0.0082	4.22	4.0059	0.0215	0.0131557	0.420972	2.591	Training	Training	Prediction
003380-34-5	c1(cc(ccc1Oc1ccc(cc1Cl)Cl)Cl)O	0.00025	6.0614	4.5726	0.0301	0.00637615	0.447747	4.009	Training	Prediction	Training
005989-27-5	C1(=CC[C@@H](CC1)C(=C)C)C	0.000702	5.2876	4.3427	0.0239	0.0251481	0.278542	3.729	Training	Training	Training

## Sheet: P.promelas logP free
CAS	SMILES	EC 50 g/L	pEC50 mol/l	Pred. by model eq.	HAT i/i (h*=0.2239)	ATSC2e	SM1_Dzs	maxHother	topoDiameter	Random	by Resp	by Strut
000057-55-6	C([C@H](C)O)O	0.71	2.0299	1.2933	0.0686	-0.390648	1.375	0	3	Training	Prediction	Training
000064-17-5	OCC	0.1	2.6632	1.7762	0.0607	-0.184297	0.666667	0	2	Prediction	Training	Training
000066-25-1	O=CCCCCC	0.014	3.8543	4.1684	0.0362	-0.0698666	0.650794	0.577153	6	Prediction	Prediction	Training
000071-41-0	CCCCCO	0.472	2.271	2.6208	0.0373	-0.160292	0.666667	0	5	Training	Prediction	Training
000078-59-1	O=C1C=C(C)CC(C)(C)C1	0.145	2.9788	3.6012	0.0334	0.14866	0.518078	0.442153	4	Training	Training	Training
000078-83-1	CC(C)CO	1.43	1.7143	2.1548	0.0496	-0.136179	0.586806	0	3	Training	Training	Training
000078-93-3	CCC(=O)C	3.22	1.3498	2.2537	0.0563	0.132201	0.682937	0	3	Prediction	Training	Training
000079-06-1	C=CC(=O)N	0.109	2.8141	3.4488	0.0611	0.426744	0.941799	0.588889	3	Training	Training	Prediction
000079-20-9	COC(=O)C	0.32	2.3643	1.9865	0.0755	0.361846	1.16825	0	3	Training	Training	Prediction
000079-46-9	CC(C)N(O)O	0.21	2.6274	2.0797	0.1343	0.913628	1.49206	0	3	Training	Training	Prediction
000079-77-6	CC1(C)CCCC(=C1/C=C/C(=O)C)C	0.00509	4.5769	4.534	0.0291	0.158253	0.45	0.460764	7	Training	Training	Training
000084-62-8	c1ccc(cc1)OC(=O)c1ccccc1C(=O)Oc1ccccc1	8e-05	6.5995	5.8897	0.1345	1.48673	2.23143	0.629375	13	Training	Training	Training
000084-66-2	c1(ccccc1C(=O)OCC)C(=O)OCC	0.0168	4.1212	4.381	0.0865	1.06285	2.29497	0.600384	9	Prediction	Training	Prediction
000084-69-5	CC(C)COC(=O)c1ccccc1C(=O)OCC(C)C	0.0009	5.49	5.2722	0.1063	1.40574	2.13145	0.582367	11	Training	Training	Prediction
000084-74-2	CCCCOC(=O)c1ccccc1C(=O)OCCCC	0.00085	5.5149	5.6808	0.1256	1.35831	2.26369	0.584383	13	Training	Prediction	Training
000085-68-7	CCCCOC(=O)c1ccccc1C(=O)OCc1ccccc1	0.00078	5.6022	5.9621	0.1281	1.20544	2.17627	0.600336	14	Prediction	Training	Training
000090-02-8	O=Cc1ccccc1O	0.0023	4.7248	3.5493	0.0725	-0.17728	1.36281	0.746875	5	Prediction	Prediction	Prediction
000094-09-7	c1cc(ccc1C(=O)OCC)N	0.0259	3.8044	4.2711	0.0373	0.609427	1.6504	0.558056	8	Training	Training	Prediction
000096-17-3	CC[C@@H](C)C=O	0.00997	3.9362	3.6655	0.0438	-0.0363683	0.594841	0.566319	4	Training	Training	Prediction
000100-41-4	c1ccc(cc1)CC	0.00909	4.0671	4.2769	0.0515	-0.0149323	-0.0888889	0.433056	5	Prediction	Training	Training
000100-42-5	c1cc(ccc1)C=C	0.00402	4.4131	4.3982	0.0595	-0.023716	-0.194444	0.45	5	Training	Prediction	Training
000100-52-7	O=Cc1ccccc1	0.00761	4.1441	4.0628	0.0592	-0.139841	0.692517	0.7	5	Training	Training	Training
000101-20-2	c1(c(ccc(c1)NC(=O)Nc1ccc(cc1)Cl)Cl)Cl	9.2e-05	6.5331	6.7712	0.1257	0.75234	0.0359109	0.504471	12	Prediction	Training	Training
000101-84-8	O(c1ccccc1)c1ccccc1	0.004	4.6286	4.9353	0.0441	0.043105	0.388889	0.533333	8	Training	Training	Training
000105-67-9	c1(cc(ccc1O)C)C	0.0154	3.8991	3.8811	0.0291	0.108938	0.625	0.502083	5	Prediction	Prediction	Prediction
000106-24-1	CC(=CCC/C(=C/CO)/C)C	0.0032	4.6828	4.4012	0.0323	-0.112471	0.537778	0.389449	8	Prediction	Prediction	Training
000107-41-5	CC(C)(C[C@@H](C)O)O	10.7	1.0429	2.062	0.0534	0.10016	1.19375	0	4	Training	Prediction	Training
000108-10-1	O=C(C)CC(C)C	0.505	2.2971	2.6067	0.0474	0.133494	0.595833	0	4	Training	Prediction	Training
000108-39-4	c1ccc(cc1O)C	0.0559	3.2862	3.6085	0.0376	0.0620406	0.634921	0.523333	4	Training	Training	Training
000108-46-3	c1(cc(ccc1)O)O	0.04	3.4395	3.1209	0.0549	-0.0521001	1.32593	0.616667	4	Training	Prediction	Prediction
000108-93-0	OC1CCCCC1	0.704	2.1528	2.3498	0.0426	-0.054967	0.743056	0	4	Prediction	Training	Training
000108-94-1	O=C1CCCCC1	0.527	2.2697	2.4024	0.045	0.0599461	0.772487	0	4	Prediction	Training	Prediction
000110-62-3	C(CCC=O)C	0.0124	3.8414	3.9079	0.0393	-0.0600843	0.657143	0.584097	5	Training	Training	Training
000110-93-0	O=C(C)CCC=C(C)C	0.0857	3.1677	3.8274	0.0185	0.131636	0.621825	0.334167	6	Training	Prediction	Prediction
000111-27-3	CCCCCCO	0.0977	3.0192	2.8947	0.0369	-0.163458	0.666667	0	6	Prediction	Training	Training
000111-46-6	C(COCCO)O	75.2	0.1493	0.8444	0.1727	-1.37283	2.07143	0	6	Prediction	Training	Training
000111-70-6	CCCCCCCO	0.0345	3.5271	3.1676	0.0403	-0.168149	0.666667	0	7	Training	Training	Training
000111-87-5	CCCCCCCCO	0.0122	4.028	3.4398	0.0475	-0.173756	0.666667	0	8	Prediction	Training	Training
000111-90-0	CCOCCOCCO	9.65	1.1429	1.6693	0.1619	-1.36904	1.7619	0	8	Training	Training	Prediction
000112-05-0	O=C(O)CCCCCCCC	0.104	3.182	3.8264	0.0966	0.973877	1.43563	0	9	Training	Training	Training
000112-27-6	OCCOCCOCCO	59.9	0.3989	0.7262	0.364	-2.02966	2.64286	0	9	Training	Training	Training
000112-30-1	C(CCCCCCC)CCO	0.0024	4.8189	3.9832	0.0732	-0.18654	0.666667	0	10	Prediction	Training	Training
000112-42-5	CCCCCCCCCCCO	0.00104	5.219	4.2546	0.0918	-0.193406	0.666667	0	11	Training	Training	Prediction
000112-53-8	CCCCCCCCCCCCCCO	0.00101	5.3266	5.0681	0.1704	-0.215022	0.666667	0	14	Training	Training	Training
000117-81-7	CCCC[C@H](CC)COC(=O)c1ccccc1C(=O)OC[C@@H](CC)CCCC	0.00016	6.3873	7.0612	0.218	1.60717	2.07943	0.55823	17	Training	Training	Training
000118-61-6	c1(c(cccc1)O)C(=O)OCC	0.0196	3.928	3.8561	0.0448	0.500148	1.80317	0.591287	7	Training	Prediction	Training
000119-34-6	c1c(cc(c(c1)O)N(O)O)N	0.0332	3.6665	2.7259	0.1444	0.597405	2.74563	0.677431	5	Training	Prediction	Training
000119-61-9	c1ccccc1C(=O)c1ccccc1	0.01089	4.2232	4.632	0.0339	-0.006241	0.648352	0.5125	8	Training	Prediction	Prediction
000121-32-4	c1(ccc(cc1OCC)C=O)O	0.0876	3.2778	3.5048	0.0976	-0.464148	1.80317	0.738787	7	Training	Prediction	Prediction
000121-33-5	c1(ccc(cc1OC)C=O)O	0.057	3.4261	3.0399	0.1268	-0.733397	1.82143	0.743889	6	Training	Training	Training
000122-03-2	O=Cc1ccc(cc1)C(C)C	0.00662	4.3497	4.7541	0.055	-0.0532856	0.56	0.682851	7	Training	Training	Training
000131-11-3	COC(=O)c1ccccc1C(=O)OC	0.039	3.6969	3.4362	0.0761	0.48191	2.32	0.612431	7	Training	Training	Training
000138-86-3	C1CC(=CC[C@H]1C(=C)C)C	0.0385	3.5485	4.7594	0.0788	0.0115072	-0.506389	0.348092	6	Training	Training	Training
000140-88-5	C(=C)C(=O)OCC	0.0025	4.6023	4.2513	0.0462	0.575178	0.841905	0.618819	5	Training	Training	Prediction
000141-78-6	O=C(OCC)C	0.23	2.583	2.4483	0.0815	0.638134	1.17103	0	4	Training	Prediction	Training
000143-08-8	CCCCCCCCCO	0.00552	4.4169	3.7116	0.0584	-0.17995	0.666667	0	9	Training	Prediction	Prediction
000470-82-6	[C@]12(OC([C@@H](CC1)CC2)(C)C)C	0.102	3.1793	3.0917	0.0654	0.375979	0.229563	0	4	Training	Training	Training
000563-80-4	C(C)(C(=O)C)C	0.864	1.9984	2.3235	0.0568	0.144813	0.612857	0	3	Training	Training	Prediction
000576-26-1	Cc1cccc(C)c1O	0.027	3.6553	3.5159	0.0324	0.108938	0.625	0.459097	4	Training	Prediction	Prediction
000586-62-9	C1=C(C)CCC(=C(C)C)C1	0.00121	5.0512	4.3534	0.0502	0.0297502	-0.15	0.296319	6	Training	Training	Training
000590-86-3	CC(CC=O)C	0.00325	4.423	3.6907	0.0453	-0.0363683	0.594841	0.578472	4	Prediction	Training	Training
000868-77-9	CC(=C)C(=O)OCCO	0.227	2.7581	3.5013	0.0322	0.203732	1.5164	0.529959	6	Training	Training	Training
000928-96-1	OCC/C=C/CC	0.381	2.4195	3.7153	0.0227	-0.170531	0.583333	0.363194	6	Training	Training	Training
002216-51-5	CC(C)[C@H]1CC[C@H](C)C[C@@H]1O	0.0189	3.9171	3.2064	0.0411	0.00925071	0.444444	0	6	Prediction	Prediction	Training
002416-94-6	Oc1c(ccc(c1C)C)C	0.0082	4.22	3.793	0.0251	0.148025	0.617284	0.443472	5	Prediction	Training	Training
003380-34-5	c1(cc(ccc1Oc1ccc(cc1Cl)Cl)Cl)O	0.00025	6.0614	5.5841	0.1166	-0.388629	-0.016521	0.551118	10	Prediction	Training	Prediction
005989-27-5	C1(=CC[C@@H](CC1)C(=C)C)C	0.000702	5.2876	4.7594	0.0788	0.0115072	-0.506389	0.348092	6	Training	Prediction	Training
